# Supplementary material
Source: publisher figshare collection journal article supplement (https://scielo.figshare.com/articles/dataset/_/6272900)
Supplement: Supplementary file 1 [file Table_1.xls]

## Sheet: Table_1
<b>Species</b>	<b>Population</b>	<b>Locality and Date of Collection.</b>	<b>Latitude S/ Longitudes W</b>	<b>Altitude (m)</b>
<em>A. magnifica</em> var. <em>magnifica</em>	4408	Región de Coquimbo. Provincia de Elqui. Inicio Cuesta Buenos Aires. 5 de octubre de 2014	29º34’18’’/71º14’35’’	473
	4411	Región de Coquimbo. Provincia de Elqui. Entre Cuesta Porotitos y Caleta Hornos. 7 de octubre de 2014	29º44’32’’/71º19’20’’	150
	4414	Región de Coquimbo. Provincia de Limarí. Bosque Hidrófilo, parte alta. 8 de octubre de 2014	30º39’45’’/71º40’57’’	598
<em>A. magnifica</em> var. <em>magenta</em>	4379	Región de Coquimbo. Provincia de Choapa. Bosque Santa Julia, fundo Agua Amarilla. 31 0ctubre de 2013	31º49’48’’/71º30’35’’	110
	4380	Región de Coquimbo. Provincia de Choapa. Entre quebrada El Negro y Los Vilos. 31 octubre 2013	31º57’20’’/71º29’14’’	138
	4381	Región de Coquimbo. Provincia de Choapa. Fundo Palo Colorado, 5 km al norte de Puente Quilimarí, frente al Cerro Tentén. 1 de noviembre de 2013	32º05’58’’/71º30’27’’	80
	4383	Región de Valparaíso. Provincia de Petorca. 2 km al sur de Los Molles. 1 de noviembre de 2013	32º14’35’’/71º29’27’’	37
<em>A. magnifica</em> var. <em>sierrae</em>	4406	Región de Coquimbo. Provincia de Elqui. Juan Soldado. 5 de octubre de 2014	29º43’04’’/71º18’25’’	175
	4407	Región de Coquimbo. Provincia de Elqui. Caleta Hornos. 5 de octubre de 2014	29º38’01’’/71º17’08’’	152
<em>A. magnifica</em> var. <em>tofoensis</em>	4409	Región de Coquimbo. Provincia de Elqui. Mina El Tofo. 6 de octubre de 2014	29º26’56’’/71º14’52’’	676
