# Supplementary material
Source: publisher figshare collection journal article supplement (https://scielo.figshare.com/articles/dataset/_/6272900)
Supplement: Supplementary file 2 [file Table_2.xls]

## Sheet: Table_2
<b></b>	<b>CV<sub>CL</sub> &#177; SD</b>	<b>M<sub>CA</sub> &#177; SD</b>	<b>TLC ± SD</b>
<em>Alstroemeria magnifica</em> var. <em>magnifica</em> (4408)	62.0 ± 2.4	45.0 ± 1.6	128.2 ± 6.2
<em>Alstroemeria magnifica</em> var. <em>magnifica</em> (4411)	60.0 ± 4.3	42.0 ± 2.3	136.5 ± 8.3
<em>Alstroemeria magnifica</em> var. <em>magnifica</em> (4414)	62.0 ± 3.5	47.0 ± 2.0	130.4 ± 5.9
<em>Alstroemeria magnifica</em> var. <em>sierrae</em> (4406)	46.0 ± 3.6	51.0 ± 1.8	187.5 ± 7.2
<em>Alstroemeria magnifica</em> var. <em>sierrae</em> (4407)	47.0 ± 4.2	50.0 ± 2.1	193.5 ± 6.8
<em>Alstroemeria magnifica</em> var. <em>tofoensis</em> (4409)	55.0 ± 3.9	55.0 ± 1.5	173.9 ± 9.2
<em>Alstroemeria magnifica</em> var. <em>magenta</em> (4379)	54.0 ± 4.8	51.0 ± 2.4	104.6 ± 8.8
<em>Alstroemeria magnifica</em> var. <em>magenta</em> (4380)	55.0 ± 5.3	51.0 ± 1.3	100.1 ± 4.6
<em>Alstroemeria magnifica</em> var. <em>magenta</em> (4381)	55.0 ± 4.4	49.0 ± 1.8	109.4 ± 5.2
<em>Alstroemeria magnifica</em> var. <em>magenta</em> (4383)	53.0 ± 3.1	50.0 ± 2.2	110.4 ± 5.9
